# Supplementary material for: Multi-walled carbon nanotubes produced after forest fires improve germination and development of Eysenhardtia polystachya
Source: PeerJ. 2020 Apr 23;8:e8634. doi: 10.7717/peerj.8634 (PMC7183754; doi:10.7717/peerj.8634)
Supplement: Supplemental Information 2 — Germination Excel tab shows Eysenhardtia seed responses, in terms of germination parameters per seed, to different concentrations of MWCNTs. Biometric Excel tab shows root and aboveground responses per plant, in terms of structure and biomass, to different concentrations of MWCNTs [file peerj-08-8634-s002.xlsx]

## Sheet: Seed germination
Treatment	Replicate	Germination Time (days)	Germination Status*	seed census time (days)
Control	1	3	1	3
Control	2	3	1	3
Control	3	3	1	3
Control	4	3	1	3
Control	5	4	1	4
Control	6	4	1	4
Control	7	4	1	4
Control	8	5	1	5
Control	9	6	1	6
Control	10	7	1	17
Natural MWCNTs 20µg/mL	1	3	1	3
Natural MWCNTs 20µg/mL	2	3	1	3
Natural MWCNTs 20µg/mL	3	3	1	3
Natural MWCNTs 20µg/mL	4	3	1	3
Natural MWCNTs 20µg/mL	5	3	1	3
Natural MWCNTs 20µg/mL	6	3	1	3
Natural MWCNTs 20µg/mL	7	4	1	4
Natural MWCNTs 20µg/mL	8	4	1	4
Natural MWCNTs 20µg/mL	9	5	1	5
Natural MWCNTs 20µg/mL	10	6	1	6
Natural MWCNTs 40µg/mL	1	3	1	3
Natural MWCNTs 40µg/mL	2	3	1	3
Natural MWCNTs 40µg/mL	3	3	1	3
Natural MWCNTs 40µg/mL	4	3	1	3
Natural MWCNTs 40µg/mL	5	3	1	3
Natural MWCNTs 40µg/mL	6	3	1	3
Natural MWCNTs 40µg/mL	7	3	1	3
Natural MWCNTs 40µg/mL	8	3	1	3
Natural MWCNTs 40µg/mL	9	3	1	3
Natural MWCNTs 40µg/mL	10	4	1	4
Natural MWCNTs 60µg/mL	1	3	1	3
Natural MWCNTs 60µg/mL	2	3	1	3
Natural MWCNTs 60µg/mL	3	3	1	3
Natural MWCNTs 60µg/mL	4	3	1	3
Natural MWCNTs 60µg/mL	5	3	1	3
Natural MWCNTs 60µg/mL	6	3	1	3
Natural MWCNTs 60µg/mL	7	3	1	3
Natural MWCNTs 60µg/mL	8	3	1	3
Natural MWCNTs 60µg/mL	9	3	1	3
Natural MWCNTs 60µg/mL	10	5	1	5
Amorphous carbon 20µg/mL	1	3	1	3
Amorphous carbon 20µg/mL	2	3	1	3
Amorphous carbon 20µg/mL	3	3	1	3
Amorphous carbon 20µg/mL	4	3	1	3
Amorphous carbon 20µg/mL	5	4	1	4
Amorphous carbon 20µg/mL	6	4	1	4
Amorphous carbon 20µg/mL	7	5	1	5
Amorphous carbon 20µg/mL	8	5	1	5
Amorphous carbon 20µg/mL	9	6	1	6
Amorphous carbon 20µg/mL	10	6	1	6
Amorphous carbon 40µg/mL	1	3	1	3
Amorphous carbon 40µg/mL	2	3	1	3
Amorphous carbon 40µg/mL	3	3	1	3
Amorphous carbon 40µg/mL	4	3	1	3
Amorphous carbon 40µg/mL	5	3	1	3
Amorphous carbon 40µg/mL	6	4	1	4
Amorphous carbon 40µg/mL	7	4	1	4
Amorphous carbon 40µg/mL	8	5	1	5
Amorphous carbon 40µg/mL	9	6	1	6
Amorphous carbon 40µg/mL	10	6	1	6
Amorphous carbon 60µg/mL	1	3	1	3
Amorphous carbon 60µg/mL	2	3	1	3
Amorphous carbon 60µg/mL	3	3	1	3
Amorphous carbon 60µg/mL	4	3	1	3
Amorphous carbon 60µg/mL	5	3	1	3
Amorphous carbon 60µg/mL	6	4	1	4
Amorphous carbon 60µg/mL	7	4	1	4
Amorphous carbon 60µg/mL	8	5	1	5
Amorphous carbon 60µg/mL	9	6	0	17
Amorphous carbon 60µg/mL	10	6	0	17
Synthetic MWCNTs 20µg/mL	1	3	1	3
Synthetic MWCNTs 20µg/mL	2	3	1	3
Synthetic MWCNTs 20µg/mL	3	4	1	4
Synthetic MWCNTs 20µg/mL	4	4	1	4
Synthetic MWCNTs 20µg/mL	5	4	1	4
Synthetic MWCNTs 20µg/mL	6	4	1	4
Synthetic MWCNTs 20µg/mL	7	4	1	4
Synthetic MWCNTs 20µg/mL	8	7	0	16
Synthetic MWCNTs 20µg/mL	9	7	0	17
Synthetic MWCNTs 20µg/mL	10	7	0	17
Synthetic MWCNTs 40µg/mL	1	3	1	3
Synthetic MWCNTs 40µg/mL	2	3	1	3
Synthetic MWCNTs 40µg/mL	3	3	1	3
Synthetic MWCNTs 40µg/mL	4	3	1	3
Synthetic MWCNTs 40µg/mL	5	3	1	3
Synthetic MWCNTs 40µg/mL	6	4	1	4
Synthetic MWCNTs 40µg/mL	7	4	1	4
Synthetic MWCNTs 40µg/mL	8	4	1	4
Synthetic MWCNTs 40µg/mL	9	7	1	7
Synthetic MWCNTs 40µg/mL	10	7	0	17
Synthetic MWCNTs 60µg/mL	1	3	1	3
Synthetic MWCNTs 60µg/mL	2	3	1	3
Synthetic MWCNTs 60µg/mL	3	3	1	3
Synthetic MWCNTs 60µg/mL	4	3	1	3
Synthetic MWCNTs 60µg/mL	5	3	1	3
Synthetic MWCNTs 60µg/mL	6	3	1	3
Synthetic MWCNTs 60µg/mL	7	5	1	5
Synthetic MWCNTs 60µg/mL	8	6	1	6
Synthetic MWCNTs 60µg/mL	9	7	0	7
Synthetic MWCNTs 60µg/mL	10	7	0	7
* 1=Germinate, 2=No germinated

## Sheet: Biometric parameters
Treatment	Leaves number	Foliar area (cm2)	Aereal part Height (cm)	Aereal part dry weight (g)	Aereal part fresh weight (g)	Primary root lengtht (cm)	Number of tertiary roots	Number of Lateral Roots	Root volume (cm3)	Root fresh weight (g)	Root dry weight (g)
Control	14	197.921	24	0.416	1.842	15.3707	226	34	0.119	0.488	0.045
Control	15	169.646	25	0.336	2.121	8.8238	308	44	0.237	0.508	0.063
Control	13	241.903	26	0.407	2.34	15.1454	334	39	0.193	0.425	0.079
Control	12	253.684	28	0.336	1.802	12.6729	424	52	0.129	0.481	0.065
Control	17	282.744	29	0.438	1.562	13.1088	333	47	0.168	0.399	0.083
Control	11	131.947	19	0.336	1.795	7.5043	405	39	0.175	0.442	0.079
Control	13	226.195	25	0.46	2.243	12.1422	393	37	0.152	0.514	0.063
Control	13	183.784	27	0.43	2.602	17.3996	333	44	0.276	0.632	0.059
Natural MWCNTs 20µg/mL	16	431.97	25	0.538	1.323	9.8015	300	37	0.328	0.554	0.076
Natural MWCNTs 20µg/mL	22	345.576	29	0.45	1.359	12.8465	326	36	0.228	0.481	0.068
Natural MWCNTs 20µg/mL	15	339.293	24	0.341	1.436	20.4397	395	58	0.201	0.359	0.108
Natural MWCNTs 20µg/mL	18	314.16	24	0.335	2.128	9.8015	300	37	0.328	0.509	0.079
Natural MWCNTs 20µg/mL	12	141.372	16	0.56	1.582	11.3765	341	35	0.34	0.51	0.078
Natural MWCNTs 20µg/mL	15	238.762	19	0.53	1.108	15.5358	256	43	0.224	0.447	0.062
Natural MWCNTs 20µg/mL	14	311.018	20	0.334	1.42	20.5571	111	43	0.216	0.429	0.069
Natural MWCNTs 20µg/mL	12	212.058	23	0.49	1.783	12.9518	323	51	0.253	0.441	0.056
Natural MWCNTs 20µg/mL	10	163.363	19	0.58	1.678	11.2337	148	50	0.363	0.537	0.061
Natural MWCNTs 20µg/mL	11	132.733	16	0.483	1.449	15.3746	376	42	0.247	0.65	0.066
Natural MWCNTs 40µg/mL	17	392.7	34	0.564	2.587	15.0156	589	45	0.361	0.678	0.09365
Natural MWCNTs 40µg/mL	19	433.541	31	0.651	2.05	17.5283	526	35	0.399	0.752	0.131
Natural MWCNTs 40µg/mL	14	424.116	24	0.606	2.148	16.7059	600	40	0.382	0.683	0.09
Natural MWCNTs 40µg/mL	14	301.594	28	0.551	3.01	17.1194	825	40	0.363	0.53	0.089
Natural MWCNTs 40µg/mL	17	280.388	24	0.623	2.583	17.023	577	33	0.356	0.632	0.091
Natural MWCNTs 40µg/mL	21	313.375	32	0.577	2.184	17.5357	343	51	0.369	0.454	0.09122
Natural MWCNTs 40µg/mL	23	362.855	24	0.532	2.654	15.8705	663	53	0.352	0.62	0.081
Natural MWCNTs 40µg/mL	18	490.09	29	0.577	2.39	22.1406	615	46	0.382	0.709	0.084
Natural MWCNTs 40µg/mL	19	345.576	29	0.542	2.05	13.8674	629	36	0.307	0.616	0.092
Natural MWCNTs 60µg/mL	21	490.09	28	0.318	1.954	15.0074	415	44	0.378	0.731	0.08
Natural MWCNTs 60µg/mL	13	328.297	24	0.41	1.357	22.459	615	33	0.349	0.603	0.1
Natural MWCNTs 60µg/mL	21	452.39	30	0.65	2.455	22.2584	614	57	0.374	0.639	0.099
Natural MWCNTs 60µg/mL	16	282.744	24	0.41	1.707	14.2748	531	27	0.272	0.699	0.089
Natural MWCNTs 60µg/mL	17	362.855	25.5	0.399	1.693	14.2126	351	41	0.415	0.758	0.098
Natural MWCNTs 60µg/mL	15	313.375	23	0.38	1.466	21.4531	351	34	0.349	0.655	0.082
Natural MWCNTs 60µg/mL	13	415.477	27	0.32	1.56	19.5134	424	58	0.358	0.592	0.085
Natural MWCNTs 60µg/mL	20	298.452	23	0.304	1.351	14.7989	680	37	0.344	0.669	0.086
Natural MWCNTs 60µg/mL	11	329.868	23	0.36	1.614	15.2805	423	40	0.435	0.674	0.086
Natural MWCNTs 60µg/mL	13	188.496	23	0.375	1.8	17.0535	471	28	0.399	0.453	0.11
Amorphous carbon 20µg/mL	12	155.509	17	0.252	1.083	12.0313	117	29	0.158	0.219	0.066
Amorphous carbon 20µg/mL	12	213.629	15	0.3235	1.988	10.6119	316	32	0.121	0.388	0.07
Amorphous carbon 20µg/mL	13	223.839	16	0.394	1.236	13.9649	227	35	0.178	0.223	0.063
Amorphous carbon 20µg/mL	18	431.97	28	0.23	2.048	18.9055	343	55	0.191	0.602	0.053
Amorphous carbon 20µg/mL	15	283.529	24	0.3235	1.535	13.5536	323	53	0.164	0.501	0.056
Amorphous carbon 20µg/mL	17	282.744	19	0.457	1.062	12.9577	191	27	0.181	0.231	0.053
Amorphous carbon 20µg/mL	23	173.573	20	0.3235	1.065	12.2515	348	38	0.18	0.559	0.063
Amorphous carbon 20µg/mL	19	251.328	22	0.318	1.405	9.0286	411	32	0.165	0.546	0.051
Amorphous carbon 20µg/mL	15	379.348	24	0.29	1.849	14.2703	246	39	0.087	0.417	0.06
Amorphous carbon 40µg/mL	15	280.388	20	0.438	1.01	11.4828	299	31	0.11	0.366	0.031
Amorphous carbon 40µg/mL	16	226.195	21	0.325	1.375	11.7377	243	38	0.107	0.303	0.036
Amorphous carbon 40µg/mL	15	268.607	22	0.131	1.75	14.6641	359	51	0.16	0.515	0.038
Amorphous carbon 40µg/mL	17	200.277	20	0.291	1.145	16.9015	260	51	0.109	0.42	0.034
Amorphous carbon 40µg/mL	13	47.124	15	0.271	1.176	16.9015	260	51	0.109	0.321	0.032
Amorphous carbon 40µg/mL	18	213.629	16.5	0.304	0.846	19.1862	235	31	0.159	0.377	0.035
Amorphous carbon 40µg/mL	13	240.332	15.5	0.291	1.17	17.9193	299	61	0.192	0.349	0.035
Amorphous carbon 40µg/mL	16	235.62	14.5	0.214	1.235	12.7856	390	45	0.191	0.366	0.055
Amorphous carbon 40µg/mL	14	188.496	20	0.425	1.389	12.9838	345	28	0.126	0.376	0.045
Amorphous carbon 40µg/mL	13	103.673	16	0.22	0.874	17.2317	304	34	0.142	0.461	0.038
Amorphous carbon 60µg/mL	16	212.058	26	0.264	1.844	10.6692	406	44	0.105	0.451	0.046
Amorphous carbon 60µg/mL	15	153.153	17	0.382	1.206	11.1484	405	52	0.208	0.187	0.062
Amorphous carbon 60µg/mL	13	226.195	20	0.3358	2.121	10.1546	458	35	0.163	0.305	0.038
Amorphous carbon 60µg/mL	20	343.22	28	0.3358	2.201	12.8188	452	47	0.229	0.339	0.046
Amorphous carbon 60µg/mL	16	173.573	22	0.3358	1.455	12.7549	498	53	0.233	0.467	0.042
Amorphous carbon 60µg/mL	16	373.065	19	0.358	1.559	12.2808	381	43	0.265	0.489	0.038
Amorphous carbon 60µg/mL	17	358.142	15	0.349	2.206	9.6372	324	38	0.245	0.454	0.052
Amorphous carbon 60µg/mL	16	150.797	18	0.326	1.005	15.9187	326	39	0.121	0.386	0.042
Synthetic MWCNTs 20µg/mL	18	102.102	18	0.314	1.039	13.1831	342	56	0.103	0.591	0.055
Synthetic MWCNTs 20µg/mL	16	24.7401	17.5	0.33675	1.148	3.4373	280	22	0.125	0.443	0.057
Synthetic MWCNTs 20µg/mL	11	102.102	16	0.304	1.021	9.7079	344	36	0.193	0.301	0.052
Synthetic MWCNTs 20µg/mL	20	314.16	21	0.32	1.28	10.5257	383	40	0.109	0.426	0.054
Synthetic MWCNTs 20µg/mL	15	141.372	20	0.318	1.443	14.213	458	40	0.194	0.414	0.048
Synthetic MWCNTs 20µg/mL	16	251.328	26	0.386	1.675	11.3693	279	43	0.127	0.434	0.049
Synthetic MWCNTs 20µg/mL	13	268.607	24	0.491	1.411	12.4681	313	41	0.185	0.456	0.051
Synthetic MWCNTs 40µg/mL	10	113.098	17	0.401	1.413	9.1083	306	36	0.103	0.53	0.037
Synthetic MWCNTs 40µg/mL	14	208.916	23	0.351	1.296	14.5061	345	41	0.189	0.407	0.044
Synthetic MWCNTs 40µg/mL	14	113.098	20	0.381	1.743	8.3342	522	30	0.279	0.486	0.071
Synthetic MWCNTs 40µg/mL	12	142.943	21	0.318	1.024	11.8326	354	33	0.283	0.482	0.061
Synthetic MWCNTs 40µg/mL	13	296.881	22	0.333	1.569	20.5564	303	53	0.267	0.403	0.049
Synthetic MWCNTs 40µg/mL	12	176.715	22	0.3568	1.5	14.0488	385	35	0.293	0.401	0.063
Synthetic MWCNTs 40µg/mL	12	226.195	21	0.3568	1.563	11.6431	251	39	0.149	0.442	0.037
Synthetic MWCNTs 40µg/mL	13	212.058	21	0.3568	1.555	11.2774	535	29	0.214	0.419	0.062
Synthetic MWCNTs 60µg/mL	15	129.591	17	0.338	1.008	16.1531	281	35	0.13	0.446	0.025
Synthetic MWCNTs 60µg/mL	13	268.607	22	0.226	1.362	8.7374	290	20	0.13	0.475	0.02
Synthetic MWCNTs 60µg/mL	9	70.686	13	0.341	0.687	13.7923	274	20	0.159	0.412	0.022
Synthetic MWCNTs 60µg/mL	11	188.496	18	0.3016	1	19.8828	240	44	0.13	0.35	0.03
Synthetic MWCNTs 60µg/mL	14	238.762	22	0.3016	1.767	12.399	246	35	0.131	0.467	0.032
Synthetic MWCNTs 60µg/mL	12	141.372	19	0.3016	1.156	12.5476	221	34	0.1	0.423	0.04
